# Supplementary material for: Genetic divergence at species boundaries of the dolphinfish (Coryphaena hippurus) in the Tropical Eastern Pacific
Source: PeerJ. 2022 Nov 17;10:e14389. doi: 10.7717/peerj.14389 (PMC9676019; doi:10.7717/peerj.14389)
Supplement: Supplemental Information 4 [file peerj-10-14389-s004.xlsx]

## Sheet: Table S1
Null allele frequecy based on Oosterhout method
Locus\Locality (Pop ID)	Bahía Magdalena (BM)	Cabo San Lucas (CSL)	Guaymas (GY)	Ocean sample (OC)	Peru (PE)	Ecuador (EC)	Punta Lobo (PL)	Mazatlan (MAZ)	Puerto Madero (CH)
Chi008	-0.0141	-0.0113	-0.0344	0.0164	0.0531	-0.001	-0.0048	0.0016	-0.0158			No data
Chi023	-0.0049	-0.0128	-0.0372	-0.0061	-0.0329	0.0359	-0.0145	0.0074	-0.0395			Null allele freq > 20%
Chi002	0.0703	-0.0914	-0.0806	0.0418	0.0613	0.0408	0.0171	0.0459	-0.038			Null allele freq < 20%
Chi008A	-0.0255	-0.0254	-0.0079	-0.0234	0.0172	0.0199	0.0568	-0.0391	-0.182
Chi037	-0.0179	0.0268	-0.0472	-0.0365	-0.1278	-0.0556	0.0109	-0.0415	-0.1139
Chi004	-0.0487	-0.105	0.0206	-0.0341	0.0712	0.07	-0.0266	0.1172	-0.0837
Chi024	0.2244	0.1809	0.2023	0.1126	0.1227	0.1757	0.0836	0.0018	0.0249
Chy062	0.3206	0.039	0.1281	0.0445	0.0902	0.037	-0.0283		0.0945
Chi284	0.036	0.0601	0.1611	-0.0903	0.0405	0.1778	0.1338	0.0387	-0.1351
Chy357	-0.1231	-0.0245	0.0351	0.0569	-0.0541	0.0984	0.1199	-0.1383	0.1162
Chi389	0.0906	-0.0072	0.2231	0.0773	0.0662	-0.0161	0.1513	0.1552	-1
Chi430	0.0999	0.0763	0.178	0.1032	0.0103	0.083	0.0717	-0.016	-0.1887
Chi453	0.1684	-0.0132	0.1793	-0.2009	-0.0031	0.0978	0.0749	0.0678	-0.2111
Chi652	0.0746	0.0543	0.0971	-0.0631	-0.017	0.0447	0.193	0.0014	0.0679
Chi688	-0.0237	-0.0222	0.0105	0.0361	0.0486	0.0389	-0.0394	0.1452	-0.073
Chi797	0.0715	0.1353	0.0465	0.0494	0.0405	0.093	0.0586	-0.015
Chi853	0.2479	0.0258	0.1279	-0.0469	0.1069	-0.154	0.0866	-0.2746	-0.3578
Chi878	0.2891	0.054	-0.0288	-0.0437	0.1236	0.0911
Chi967	-0.2067	0.0554	0.2487	0.0462	-0.6483	0.1129	0.0591	0.0594	0.0614
Loci included in final analyses in bold
