# Supplementary material for: Genetic divergence at species boundaries of the dolphinfish (Coryphaena hippurus) in the Tropical Eastern Pacific
Source: PeerJ. 2022 Nov 17;10:e14389. doi: 10.7717/peerj.14389 (PMC9676019; doi:10.7717/peerj.14389)
Supplement: Supplemental Information 5 — First probability test and then, when H1 = heterozygote deficit [file peerj-10-14389-s005.xlsx]

## Sheet: Table S2
Test of Hardy Weinberg Equilibrium by locus. First probability test and then, when H1= heterozygote deficit
Significant values (in red) after bonferroni correction in yellow
Probability test
Global results by locus
Locus	P-value	Critical value	No. Loci
Chi008	0.024411	0.05	19
Chi023	0.210296	0.05	19
Chi002	0.337832	0.05	19
Chi008A	0.607833	0.05	19
Chi037	0.097139	0.05	19
Chi004	0.277131	0.05	19
Chi024	9.89e-16	0.05	19
Chy062	5.2e-07	0.05	19
Chi284	0.00011	0.05	19
Chy357	0.001576	0.05	19
Chi389	5.35e-07	0.05	19
Chi430	1.96e-05	0.05	19
Chi453	0.000112	0.05	19
Chi652	3.21e-10	0.05	19
Chi688	0.028343	0.05	19
Chi797	7.26e-12	0.05	19
Chi853	4.36e-05	0.05	19
Chi878	0.0001	0.05	19
Chi967	1.69e-15	0.05	19
Hardy Weinberg test when H1= heterozygote deficit
Results by locus
Locality (Pop ID)	Chi008	Chi023	Chi002	Chi008A	Chi037	Chi004	Chi024	Chy062	Chi284	Chy357	Chi389	Chi430	Chi453	Chi652	Chi688	Chi797	Chi853	Chi878	Chi967
Bahía Magdalena (BM)	0.5585	0.4205	0.1567	0.7704	0.7526	0.4755	0.0667	0	0.2197	0.6365	0.0646	0.0427	0.0392	0.1502	0.3863	0.0259	0.0006	0	1
Punta Lobo (PL)	0.3447	0.6141	0.3722	0.0482	0.005	0.7605	0.0009	0.6836	0.004	0.0001	0.0083	0.2065	0.0206	0.0001	1	0.0205	0.0019	-	0.029
Cabo San Lucas (CSL)	0.6964	0.5386	0.929	0.36	0.0103	0.9144	0	0.0355	0.1268	0.1628	0.3407	0.0193	0.7029	0.1609	0.6951	0	0.1968	0.3532	0.0002
Guaymas (GY)	0.8446	0.8106	0.9648	0.4734	0.9045	0.3293	0	0.0129	0.0094	0.0056	0	0.0055	0.0032	0.0607	0.2487	0.0138	0.0001	1	0
Ocean sample (OC)	0.168	0.5729	0.1583	0.82	0.8462	0.5793	0.0016	0.0085	0.9389	0.1222	0.0715	0.4165	0.9927	0.2104	0.0482	0.0316	0.294	1	0.1021
Mazatlan (MAZ)	0.433	0.3646	0.2825	0.1052	0.6784	0.1747	0.0459	1	0.2895	0.9577	0.0299	0.0651	0.0176	0.004	0.003	0.7031	1	-	0.0744
Puerto Madero (CH)	0.5808	0.7279	0.6547	1	0.8889	0.8295	0.1105	0.0411	1	0.0196	1	0.873	1	0.0395	1	1	1	-	0.0783
Peru (PE)	0.0168	0.8319	0.1548	0.0455	0.9993	0.1458	0.0005	0.228	0.2931	0.847	0.1538	0.012	0.5787	0.6116	0.1114	0.0706	0.0736	0.0137	1
Ecuador (EC)	0.0731	0.3333	0.0108	0.2264	0.5154	0.1203	0.0001	0.0865	0.0002	0.0007	0.1228	0.0001	0.0006	0.0011	0.0422	0	0.9732	0.0041	0.0424
