# Supplementary material for: Genetic divergence at species boundaries of the dolphinfish (Coryphaena hippurus) in the Tropical Eastern Pacific
Source: PeerJ. 2022 Nov 17;10:e14389. doi: 10.7717/peerj.14389 (PMC9676019; doi:10.7717/peerj.14389)
Supplement: Supplemental Information 6 — Linkage disequilibrium between pairs of loci. [file peerj-10-14389-s006.xlsx]

## Sheet: Table S3
Linkage disequilibrium between pairs of loci
Significant values in red. After Bonferroni correction no significant linkage disequilibrium was detected in any pairs of loci .
Locus pair	Chi2	df	P-Value
Chi008 & Chi023	>45.017378	16	<0.000138
Chi008 & Chi002	>49.53058	16	<2.72e-005
Chi023 & Chi002	33.8314	18	0.013213
Chi008 & Chi008A	14.069	16	0.593573
Chi023 & Chi008A	13.4543	18	0.763909
Chi002 & Chi008A	16.5808	18	0.552079
Chi008 & Chi037	30.3243	16	0.016391
Chi023 & Chi037	12.0193	18	0.846237
Chi002 & Chi037	27.9518	18	0.062792
Chi008A & Chi037	32.8747	18	0.017282
Chi008 & Chi004	21.9817	16	0.143783
Chi023 & Chi004	10.9079	16	0.815133
Chi002 & Chi004	16.4627	18	0.560288
Chi008A & Chi004	23.3322	18	0.178145
Chi037 & Chi004	15.7621	18	0.609144
Chi008 & Chi024	16.909	14	0.261058
Chi023 & Chi024	12.6449	14	0.554656
Chi002 & Chi024	19.4474	16	0.246146
Chi008A & Chi024	0	16	1
Chi037 & Chi024	11.022	16	0.808124
Chi004 & Chi024	14.0594	14	0.445292
Chi008 & Chy062	>36.778332	12	<0.000243
Chi023 & Chy062	18.1716	12	0.11058
Chi002 & Chy062	14.3809	14	0.421737
Chi008A & Chy062	5.68536	14	0.97381
Chi037 & Chy062	12.6953	14	0.550647
Chi004 & Chy062	11.1872	14	0.671269
Chi024 & Chy062	9.86715	12	0.627615
Chi008 & Chi284	8.43349	16	0.934902
Chi023 & Chi284	5.01498	14	0.985603
Chi002 & Chi284	22.4298	16	0.129847
Chi008A & Chi284	11.6175	16	0.769867
Chi037 & Chi284	16.7829	16	0.399777
Chi004 & Chi284	6.78244	16	0.97723
Chi024 & Chi284	8.82119	16	0.920594
Chy062 & Chi284	10.3394	12	0.586216
Chi008 & Chy357	23.2027	16	0.108423
Chi023 & Chy357	9.99685	18	0.932009
Chi002 & Chy357	13.9009	18	0.73553
Chi008A & Chy357	8.11722	18	0.97684
Chi037 & Chy357	27.0441	18	0.078171
Chi004 & Chy357	8.87021	18	0.962674
Chi024 & Chy357	12.1485	14	0.594375
Chy062 & Chy357	6.68495	12	0.877712
Chi284 & Chy357	7.34046	16	0.966127
Chi008 & Chi389	20.3935	16	0.203019
Chi023 & Chi389	12.1456	14	0.594609
Chi002 & Chi389	11.795	16	0.75797
Chi008A & Chi389	10.2104	16	0.855413
Chi037 & Chi389	12.282	16	0.724349
Chi004 & Chi389	18.1236	16	0.316709
Chi024 & Chi389	10.8932	12	0.538089
Chy062 & Chi389	12.6086	10	0.246383
Chi284 & Chi389	4.72571	16	0.996957
Chy357 & Chi389	9.49199	16	0.891779
Chi008 & Chi430	12.5402	14	0.563007
Chi023 & Chi430	8.68698	16	0.925742
Chi002 & Chi430	24.6431	18	0.135067
Chi008A & Chi430	15.3498	18	0.637823
Chi037 & Chi430	10.088	16	0.86199
Chi004 & Chi430	4.4647	18	0.99948
Chi024 & Chi430	8.52173	12	0.743147
Chy062 & Chi430	21.3966	10	0.018492
Chi284 & Chi430	22.8076	16	0.118975
Chy357 & Chi430	10.6653	16	0.829658
Chi389 & Chi430	13.3313	16	0.648399
Chi008 & Chi453	14.1366	16	0.58854
Chi023 & Chi453	12.0076	18	0.846844
Chi002 & Chi453	6.09552	18	0.995794
Chi008A & Chi453	25.1652	18	0.120434
Chi037 & Chi453	14.803	18	0.675448
Chi004 & Chi453	9.57109	18	0.94501
Chi024 & Chi453	10.5481	16	0.836486
Chy062 & Chi453	4.60511	10	0.91595
Chi284 & Chi453	12.2299	16	0.728007
Chy357 & Chi453	>48.053462	16	<4.66e-005
Chi389 & Chi453	8.72041	16	0.924479
Chi430 & Chi453	7.27552	14	0.923568
Chi008 & Chi652	12.6354	16	0.699209
Chi023 & Chi652	4.07923	18	0.999726
Chi002 & Chi652	9.91714	18	0.934577
Chi008A & Chi652	13.2132	18	0.778757
Chi037 & Chi652	22.2197	18	0.222378
Chi004 & Chi652	9.47886	18	0.947597
Chi024 & Chi652	9.4274	12	0.666056
Chy062 & Chi652	18.1467	12	0.111308
Chi284 & Chi652	>129.141052	16	<9.42e-020
Chy357 & Chi652	16.7278	18	0.541892
Chi389 & Chi652	15.6682	16	0.476348
Chi430 & Chi652	16.0724	16	0.447922
Chi453 & Chi652	18.0303	16	0.322125
Chi008 & Chi688	>31.884769	12	<0.001442
Chi023 & Chi688	13.8357	14	0.462023
Chi002 & Chi688	10.4927	14	0.725345
Chi008A & Chi688	0	14	1
Chi037 & Chi688	19.852	14	0.134876
Chi004 & Chi688	4.33165	12	0.976681
Chi024 & Chi688	9.99599	12	0.616313
Chy062 & Chi688	15.1038	14	0.371098
Chi284 & Chi688	15.2928	10	0.121748
Chy357 & Chi688	9.90991	14	0.76874
Chi389 & Chi688	12.5516	10	0.249832
Chi430 & Chi688	10.8961	12	0.537843
Chi453 & Chi688	6.39251	8	0.603354
Chi652 & Chi688	18.6156	12	0.098237
Chi008 & Chi797	>34.663637	14	<0.001648
Chi023 & Chi797	>39.916872	14	<0.000263
Chi002 & Chi797	>35.689412	14	<0.001161
Chi008A & Chi797	8.02031	14	0.888265
Chi037 & Chi797	20.2817	14	0.121508
Chi004 & Chi797	13.5967	12	0.327198
Chi024 & Chi797	20.3156	8	0.009206
Chy062 & Chi797	17.0626	10	0.072991
Chi284 & Chi797	13.1604	10	0.214844
Chy357 & Chi797	8.56971	10	0.573367
Chi389 & Chi797	14.6434	12	0.261522
Chi430 & Chi797	8.27674	14	0.874416
Chi453 & Chi797	8.45234	12	0.748859
Chi652 & Chi797	0.916471	12	0.999991
Chi688 & Chi797	13.3792	10	0.203238
Chi008 & Chi853	8.52434	16	0.931704
Chi023 & Chi853	17.7589	16	0.338205
Chi002 & Chi853	15.2936	18	0.641722
Chi008A & Chi853	23.3354	18	0.178028
Chi037 & Chi853	18.1614	18	0.445066
Chi004 & Chi853	16.5565	18	0.553771
Chi024 & Chi853	6.06429	12	0.912807
Chy062 & Chi853	6.69657	14	0.945777
Chi284 & Chi853	25.6357	16	0.059375
Chy357 & Chi853	5.26714	18	0.998379
Chi389 & Chi853	11.9224	16	0.749302
Chi430 & Chi853	17.5264	18	0.48724
Chi453 & Chi853	19.6245	18	0.354353
Chi652 & Chi853	15.5071	18	0.626905
Chi688 & Chi853	2.70329	14	0.999493
Chi797 & Chi853	3.55116	12	0.990244
Chi008 & Chi878	6.12339	12	0.909735
Chi023 & Chi878	5.47341	12	0.940273
Chi002 & Chi878	5.95588	12	0.91829
Chi008A & Chi878	10.1248	12	0.605017
Chi037 & Chi878	8.42544	12	0.751063
Chi004 & Chi878	2.3906	12	0.998529
Chi024 & Chi878	7.51374	12	0.821883
Chy062 & Chi878	6.14439	12	0.908629
Chi284 & Chi878	3.57067	12	0.989999
Chy357 & Chi878	9.71935	12	0.640567
Chi389 & Chi878	16.3764	10	0.089353
Chi430 & Chi878	10.0442	10	0.436628
Chi453 & Chi878	2.32876	12	0.99871
Chi652 & Chi878	16.8315	12	0.156047
Chi688 & Chi878	5.56715	12	0.936313
Chi797 & Chi878	1.06008	8	0.99784
Chi853 & Chi878	6.91158	12	0.863401
Chi008 & Chi967	21.1811	16	0.171655
Chi023 & Chi967	13.2656	18	0.775556
Chi002 & Chi967	13.8582	18	0.738288
Chi008A & Chi967	5.38607	18	0.998119
Chi037 & Chi967	11.7838	18	0.858198
Chi004 & Chi967	10.8656	18	0.899973
Chi024 & Chi967	12.2825	14	0.583631
Chy062 & Chi967	16.1138	12	0.186077
Chi284 & Chi967	11.5109	14	0.645516
Chy357 & Chi967	13.0072	16	0.672231
Chi389 & Chi967	31.0633	16	0.013208
Chi430 & Chi967	7.80985	18	0.981335
Chi453 & Chi967	16.3412	16	0.429413
Chi652 & Chi967	14.8871	16	0.53292
Chi688 & Chi967	6.50989	14	0.95196
Chi797 & Chi967	7.28858	12	0.837969
Chi853 & Chi967	16.9409	18	0.527174
Chi878 & Chi967	8.35083	12	0.757149
